# Supplementary material for: Modulation of Properties by Ion Changing Based on Luminescent Ionic Salts Consisting of Spirobi(boron ketoiminate)
Source: MDPI journal article supplement (doi:10.3390/molecules27113438), 2022-05-26
Supplement: s1 [file s1]

## Supporting Information

# Modulation of Properties by Ion Changing Based on Luminescent Ionic Salts Consisting of Spirobi(boron ketoiminate)

Kazumasa Suenaga, Shunichiro Ito, Kazuo Tanaka\* and Yoshiki Chujo

*Department of Polymer Chemistry, Graduate School of Engineering, Kyoto University  
Katsura, Nishikyo-ku, Kyoto 615-8510, Japan*

Tel: +81-75-383-2604

Fax: +81-75-383-2605

E-mail: [tanaka@poly.synchem.kyoto-u.ac.jp](mailto:tanaka@poly.synchem.kyoto-u.ac.jp)

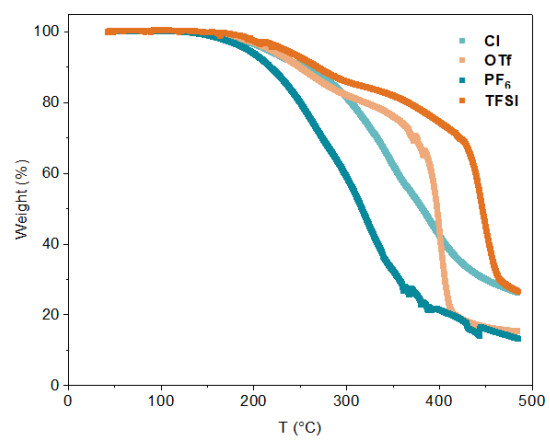

**Figure S1.** TGA diagrams of BBK salts under N<sub>2</sub> flowing.

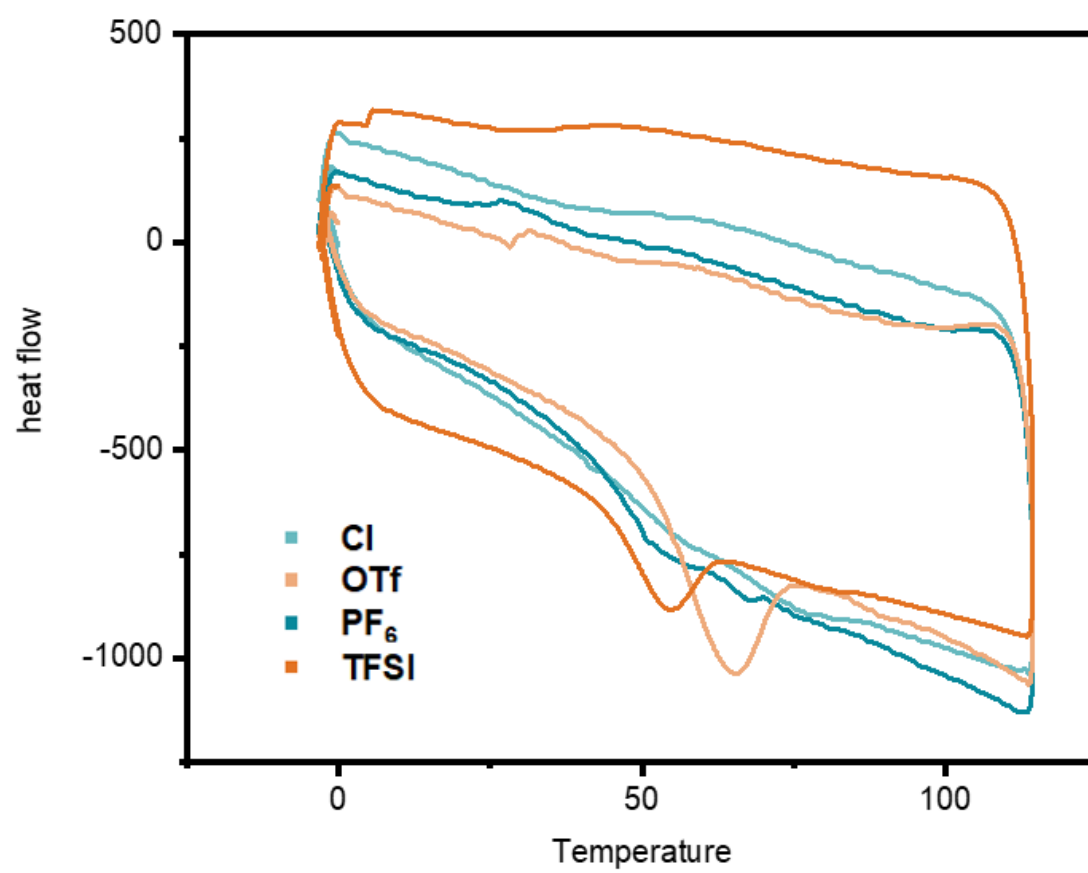

**Figure S2.** DSC profiles of BBK salts.

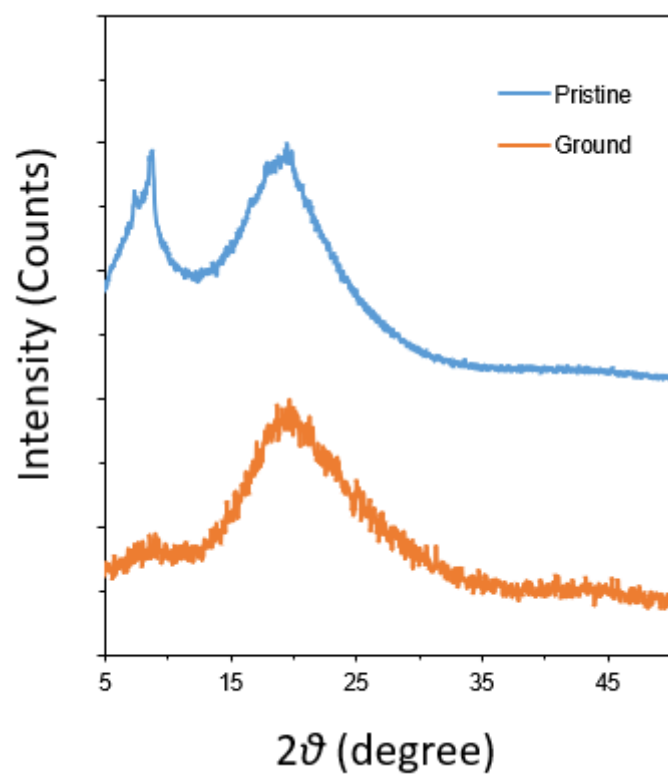

**Figure S3.** XRD profiles of BBK-PF<sub>6</sub> before and after the mechanical treatment.

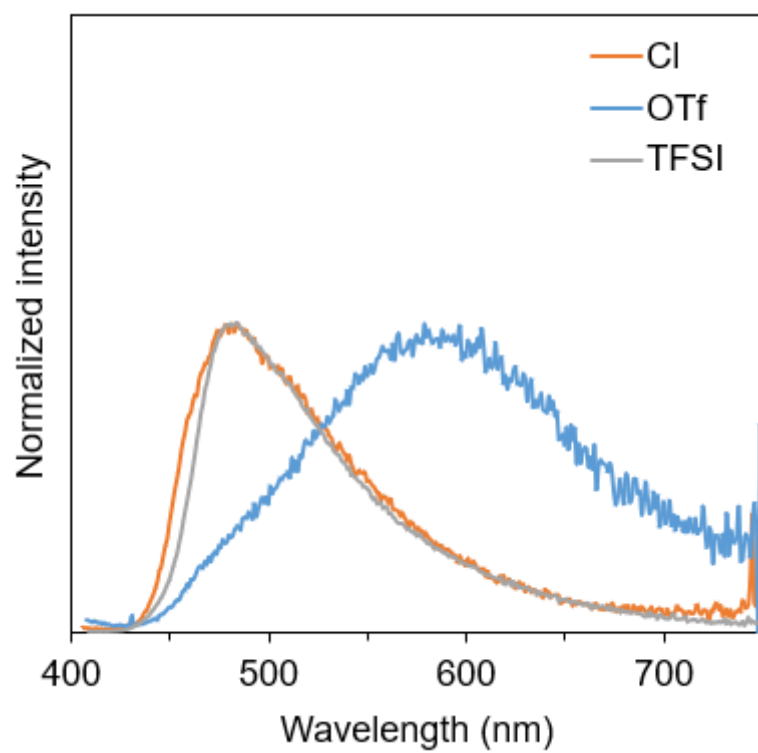

**Figure S4.** Solid-state luminescent properties of BBK salts.

**Table S1.** Optical properties of BBK-PF<sub>6</sub>

|           | $\lambda_{ab}$ [nm] | $\lambda_{em}$ [nm] | $\Phi$ |
|-----------|---------------------|---------------------|--------|
| Solution  | 391                 | 453                 | 0.26   |
| Crystal   | -                   | 506                 | 0.10   |
| Amorphous | -                   | 477                 | 0.15   |

**Table S2.** Solid-state luminescent properties of BBK salts

| salts               | Cl    | OTf   | TFSI  |
|---------------------|-------|-------|-------|
| $\lambda_{em}$ (nm) | 484   | 579   | 484   |
| $\Phi_{em}$         | 0.026 | 0.015 | 0.063 |

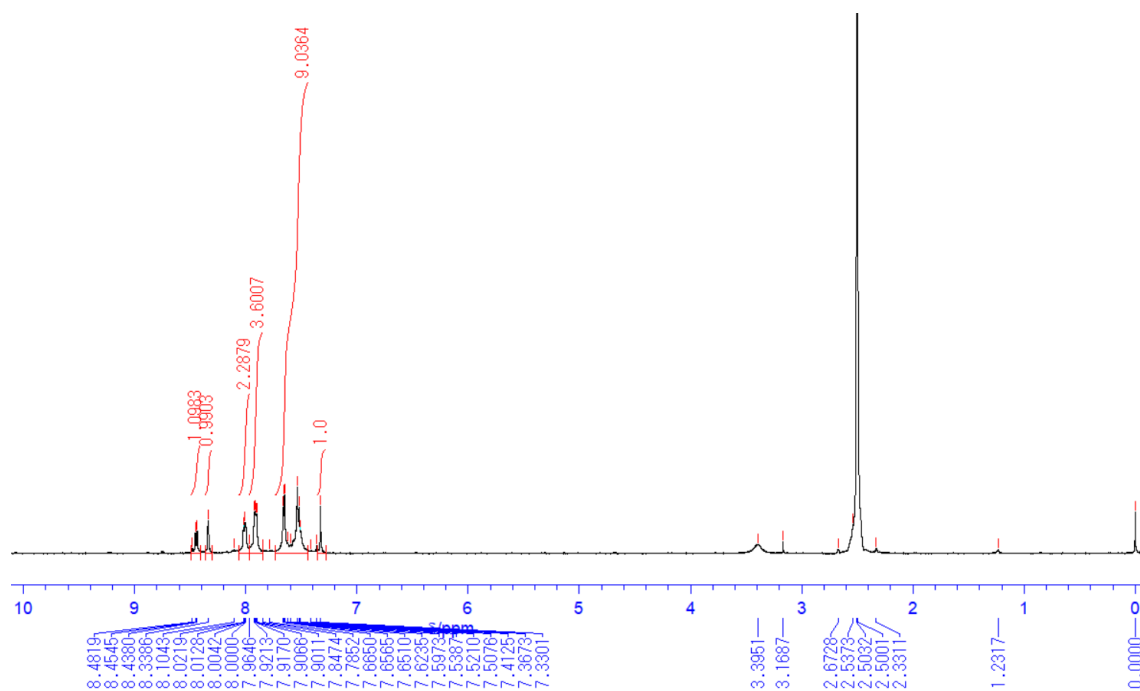

**Figure S5.**  $^1\text{H}$  NMR spectrum of BBK-Cl in  $\text{DMSO-}d_6$ .

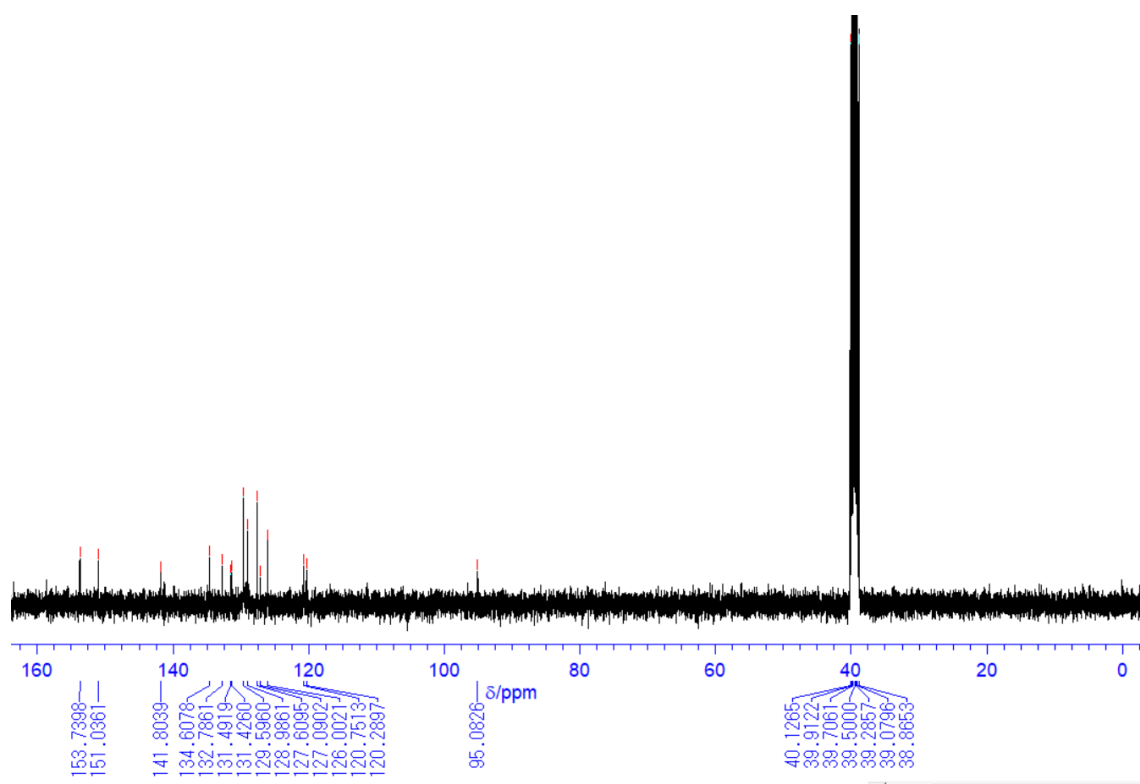

**Figure S6.**  $^{13}\text{C}$  NMR spectrum of BBK-Cl in  $\text{DMSO-}d_6$ .

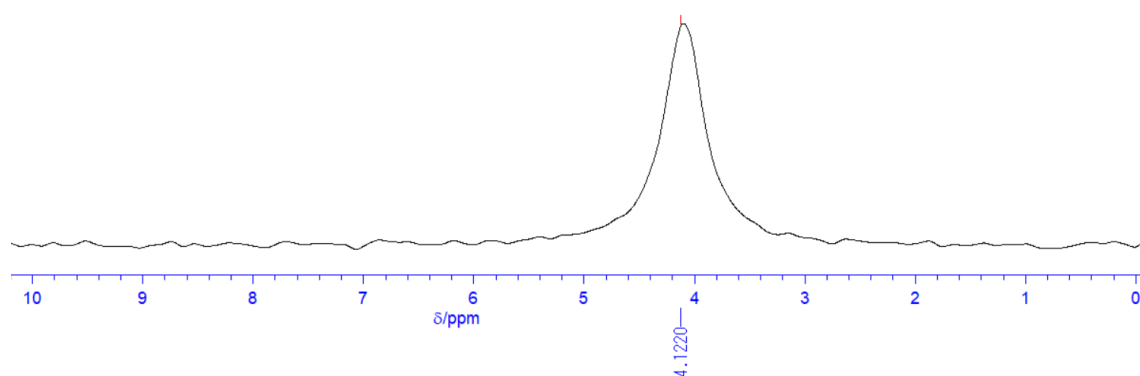

**Figure S7.**  $^{11}\text{B}$  NMR spectrum of BBK-Cl in  $\text{DMSO}-d_6$ .

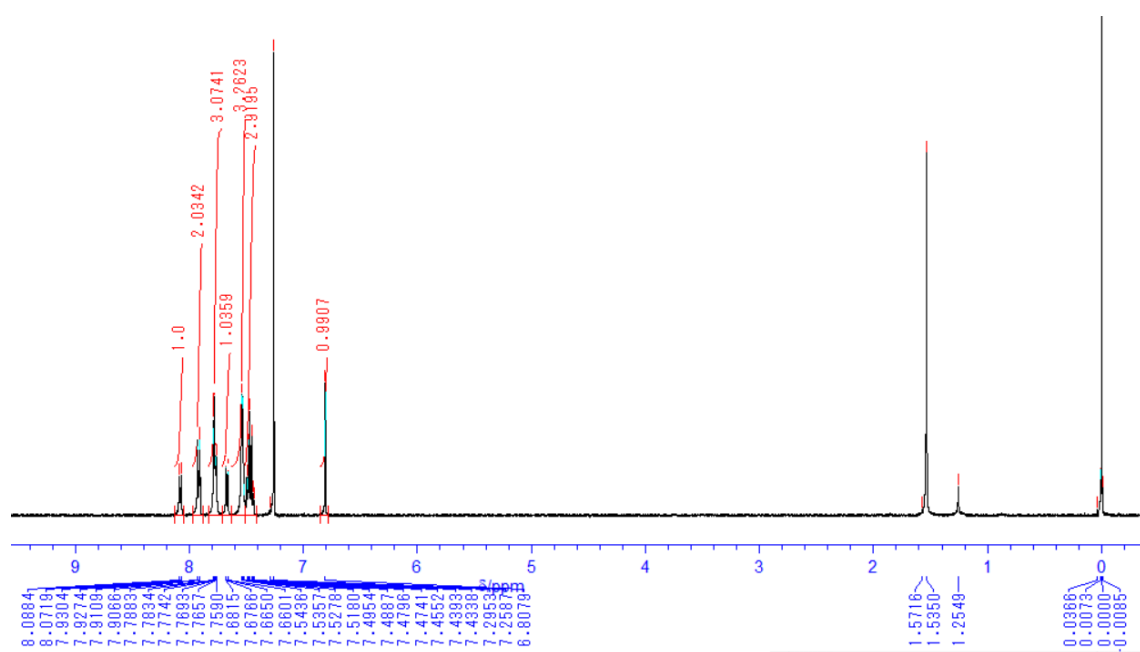

**Figure S8.**  $^1\text{H}$  NMR spectrum of BBK- $\text{PF}_6$  in  $\text{CDCl}_3$ .



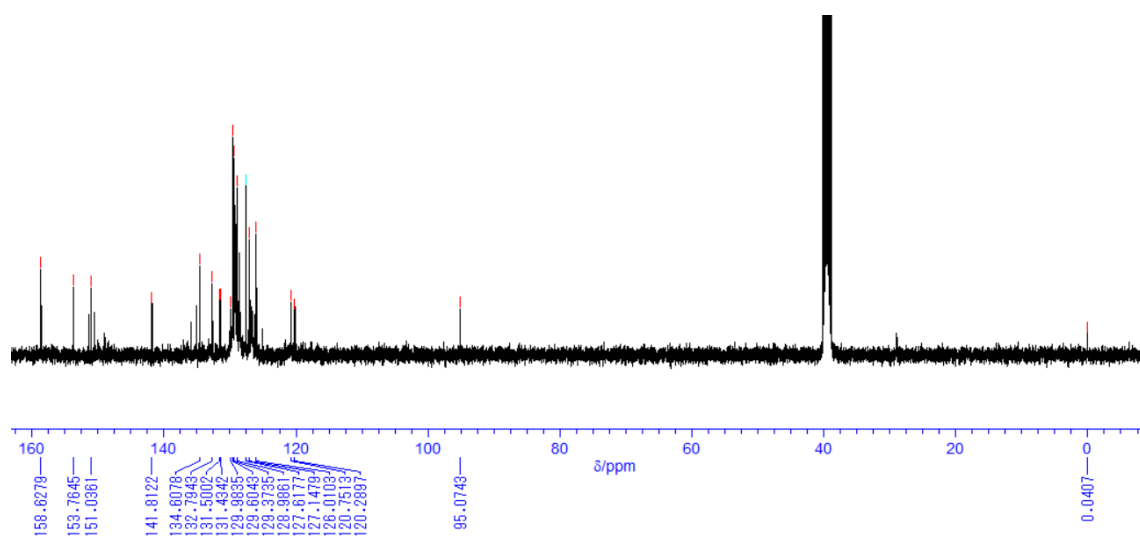

**Figure S9.**  $^{13}\text{C}$  NMR spectrum of BBK- $\text{PF}_6$  in  $\text{DMSO}-d_6$ .

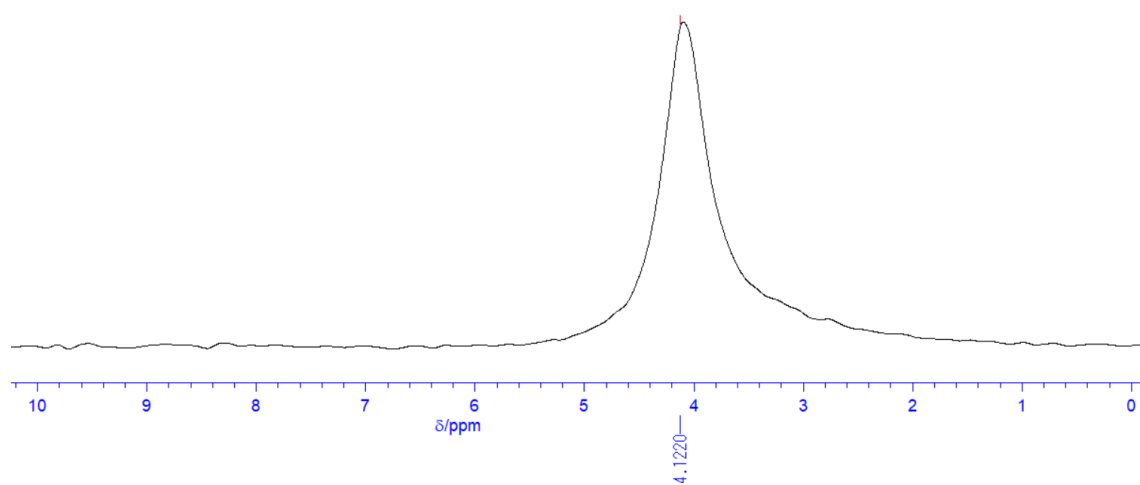

**Figure S10.**  $^{11}\text{B}$  NMR spectrum of BBK- $\text{PF}_6$  in  $\text{DMSO}-d_6$ .

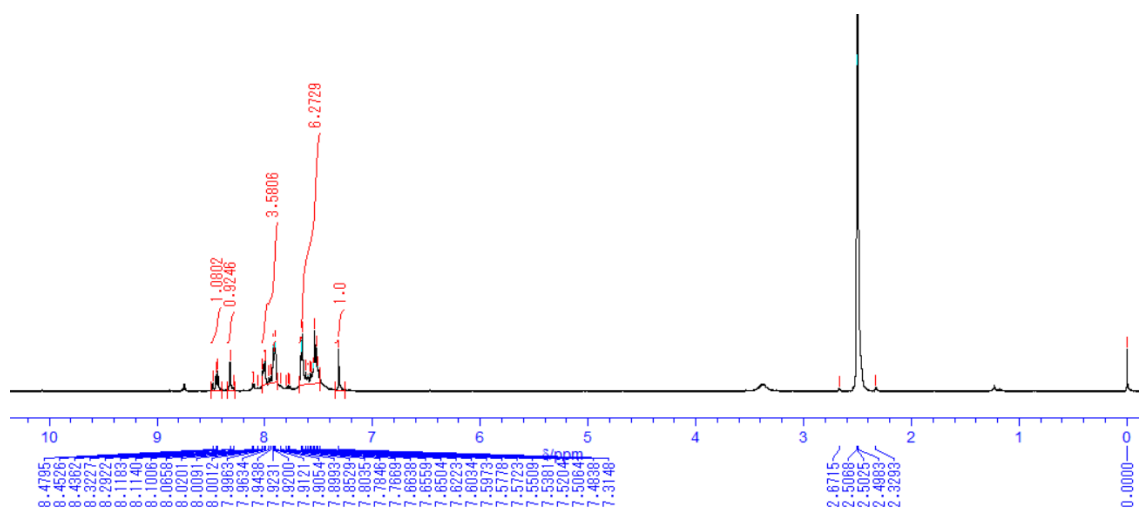

**Figure S11.**  $^1\text{H}$  NMR spectrum of BBK-OTf in  $\text{DMSO}-d_6$ .

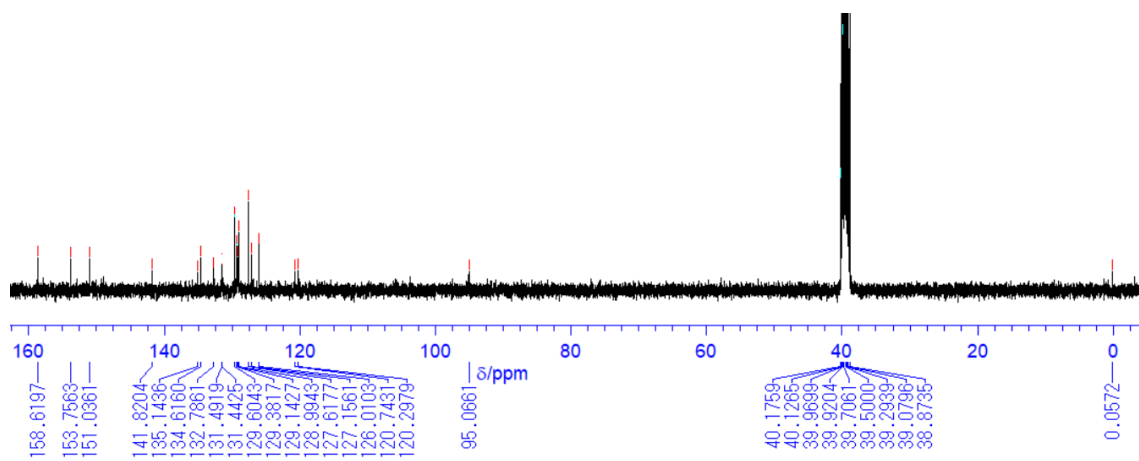

**Figure S12.**  $^{13}\text{C}$  NMR spectrum of BBK-OTf in  $\text{DMSO}-d_6$ .

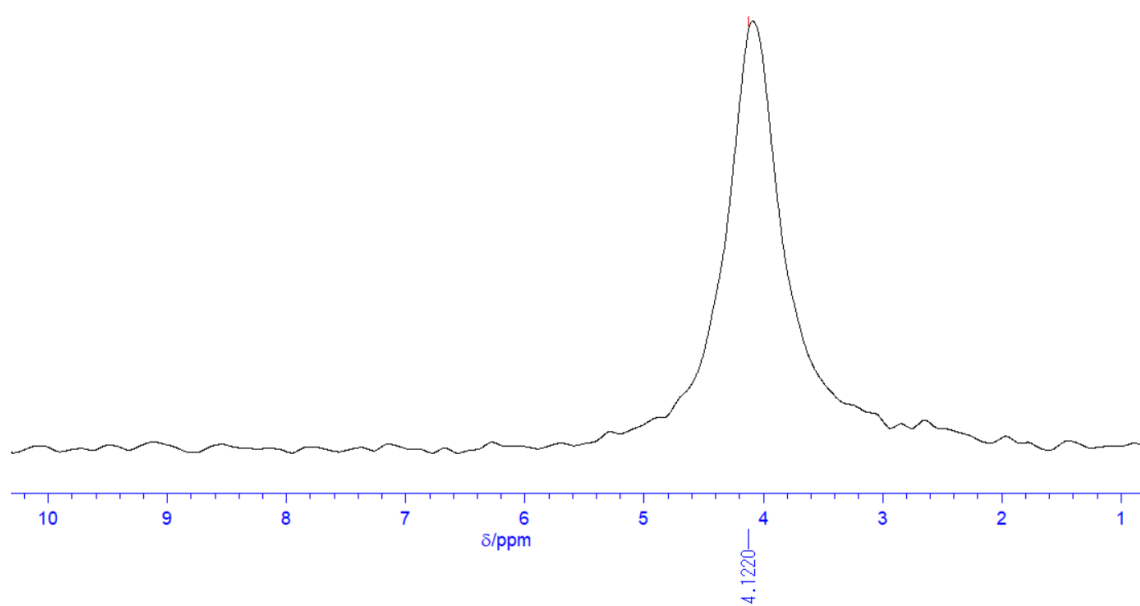

**Figure S13.**  $^{11}\text{B}$  NMR spectrum of BBK-OTf in  $\text{DMSO-}d_6$ .

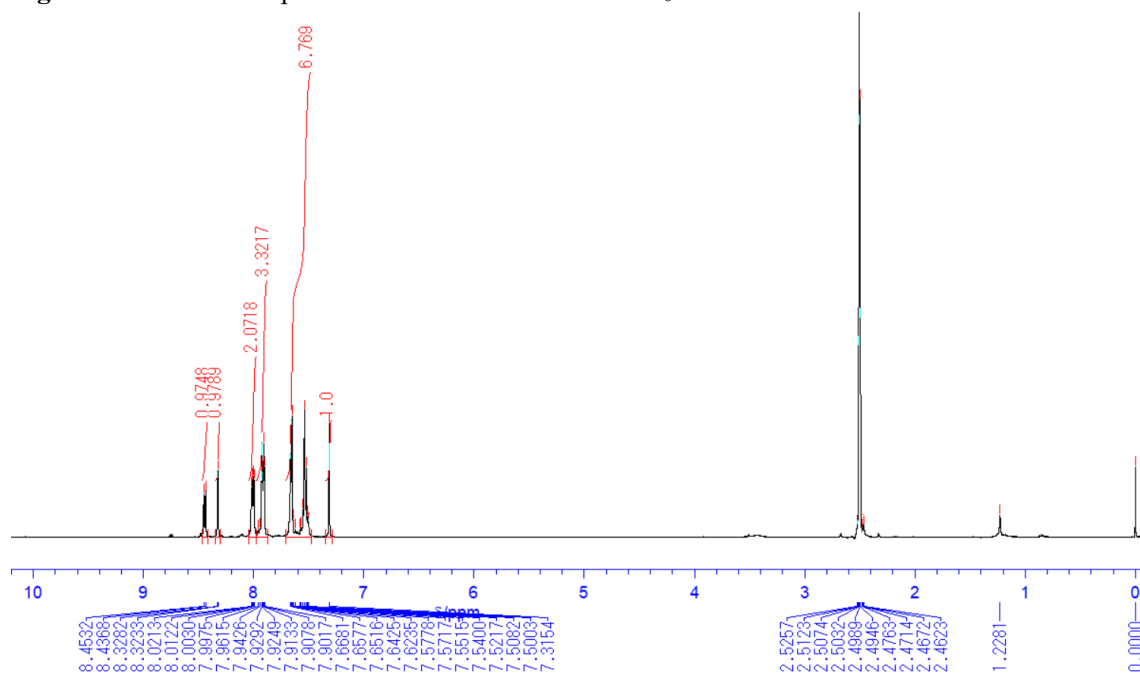

**Figure S14.**  $^1\text{H}$  NMR spectrum of BBK-TFSI in  $\text{DMSO-}d_6$ .

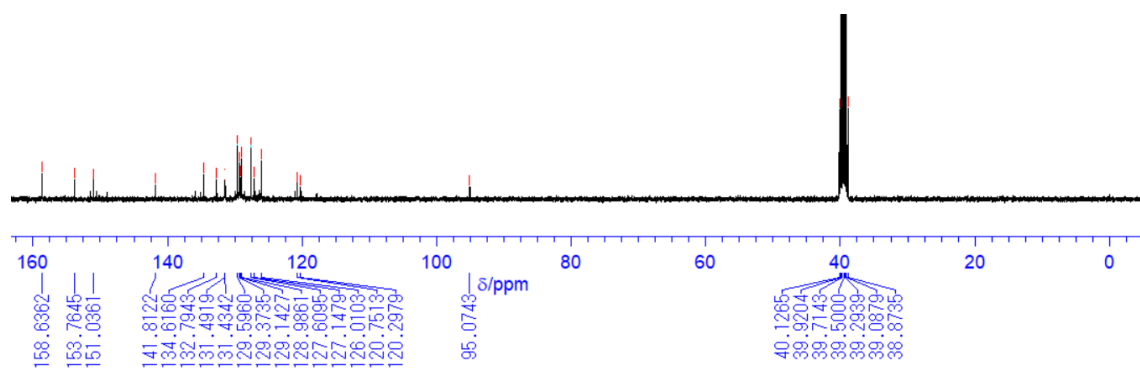

**Figure S15.**  $^{13}\text{C}$  NMR spectrum of BBK-TFSI in  $\text{DMSO-}d_6$ .

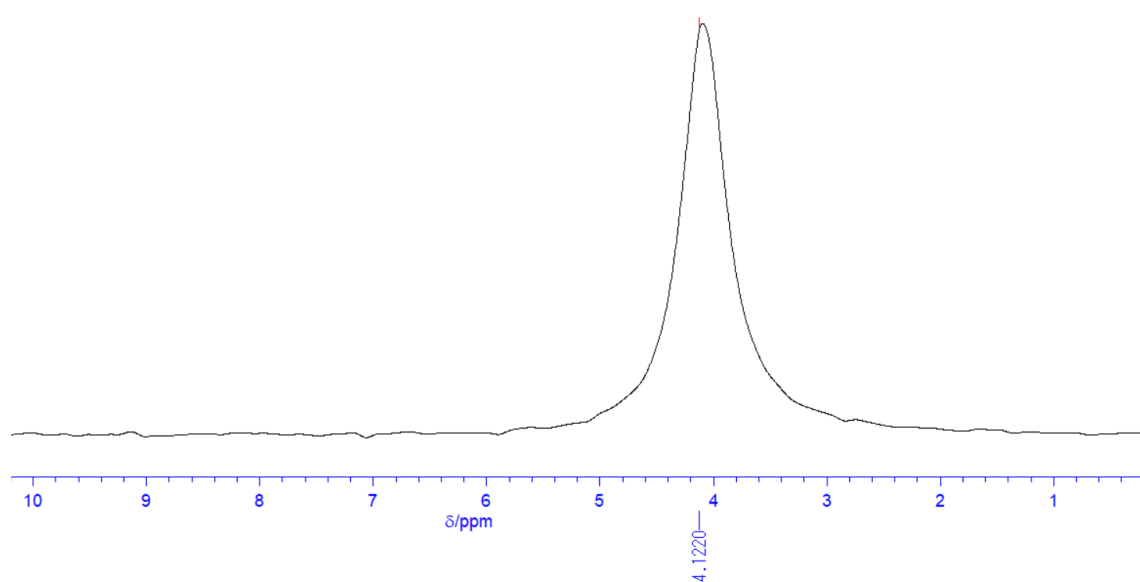

**Figure S16.**  $^{11}\text{B}$  NMR spectrum of BBK-TFSI in  $\text{DMSO-}d_6$ .
